# Supplementary material for: Serotonin Transporter Deficiency is Associated with Dysbiosis and Changes in Metabolic Function of the Mouse Intestinal Microbiome
Source: PubMed Central journal article supplement (PMC6375953; doi:10.1038/s41598-019-38489-8), 2019-02-14
Supplement: 41598_2019_38489_MOESM1_ESM.pdf [file 41598_2019_38489_MOESM1_ESM.pdf]

## Supplementary Information

### **Serotonin Transporter Deficiency is Associated with Dysbiosis and Changes in Metabolic Function of the Mouse Intestinal Microbiome**

Megha Singhal<sup>1,†</sup>, Benjamin A Turturice<sup>† 2,3</sup>, Christopher R Manzella<sup>4</sup>, Ravi Ranjan<sup>2</sup>, Ahmed A Metwally<sup>2, 6</sup>, Juliana Theorell<sup>2</sup>, Yue Huang<sup>2</sup>, Waddah A Alrefai<sup>1,8</sup>, Pradeep K Dudeja<sup>1,8</sup>, Patricia W Finn<sup>\* 2</sup>, David L Perkins<sup>\* 5, 6, 7</sup>, Ravinder K Gill<sup>\*,1</sup>

1. *Division of Gastroenterology & Hepatology,*
2. *Division of Pulmonary, Critical Care, Sleep and Allergy,*
3. *Department of Microbiology & Immunology,*
4. *Department of Physiology and Biophysics,*
5. *Division of Nephrology*
6. *Department of Surgery,*
7. *Department of Bioengineering,*
- University of Illinois at Chicago; and*
8. *Jesse Brown VA Medical Center, Chicago, IL*

† Equal contribution

\* Co-senior authors (Equal contribution)

#### **Correspondence:**

Ravinder K. Gill, Ph.D.

Associate Professor

Division of Gastroenterology & Hepatology

820 South Damen Avenue Chicago, IL 60612

Tel. (312)-569-7463

Fax (312)-569-8114

E-mail: [rgill@uic.edu](mailto:rgill@uic.edu)

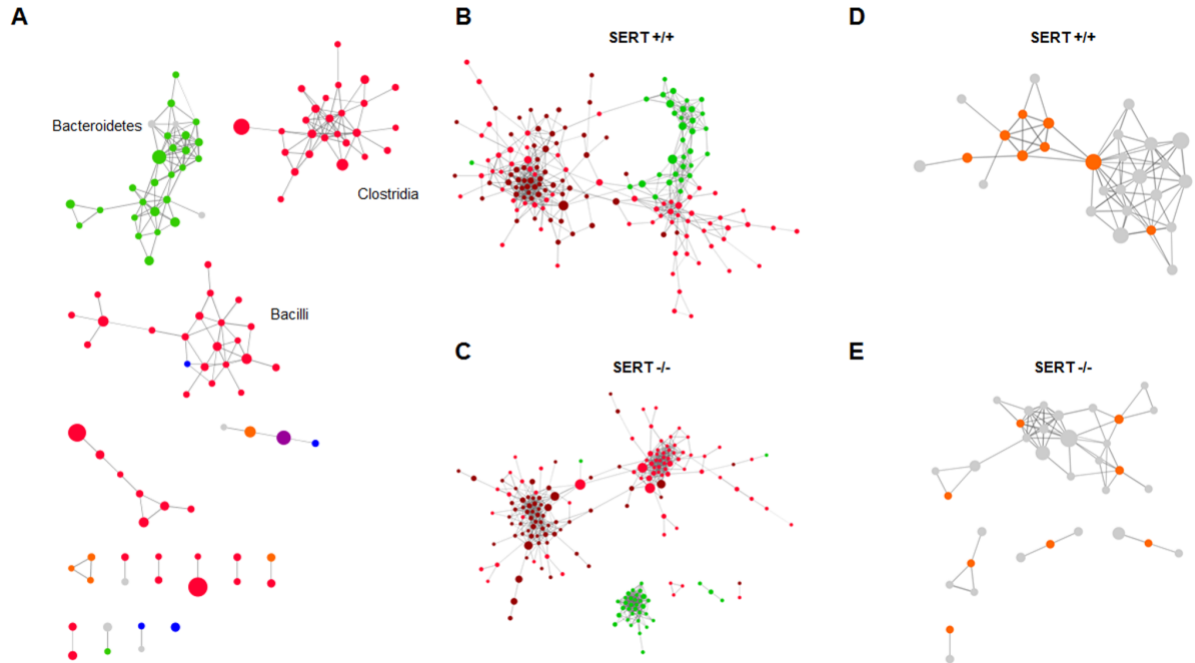

**Figure S1. Structural similarities and differences between  $SERT^{+/+}$  and  $SERT^{-/-}$  co-occurrence networks.** (A) Edge overlaps between  $SERT^{+/+}$  and  $SERT^{-/-}$  mice. Three main communities that were shared between  $SERT^{+/+}$  and  $SERT^{-/-}$  are labelled: Bacteroidetes, Clostridia, and Bacilli. Nodes are colored by their respective phyla: Bacteroidetes (green), Firmicutes (red), Proteobacteria (blue), Actinobacteria (orange), Verrucomicrobia (purple), and Other (grey). Communities of Clostridia (dark brown), Bacilli (red), and Bacteroidetes (green) shown for (B)  $SERT^{+/+}$  and (C)  $SERT^{-/-}$  mice. Bifidobacterium (orange) communities and their first neighbors (grey) shown for (D)  $SERT^{+/+}$  and (E)  $SERT^{-/-}$  mice.

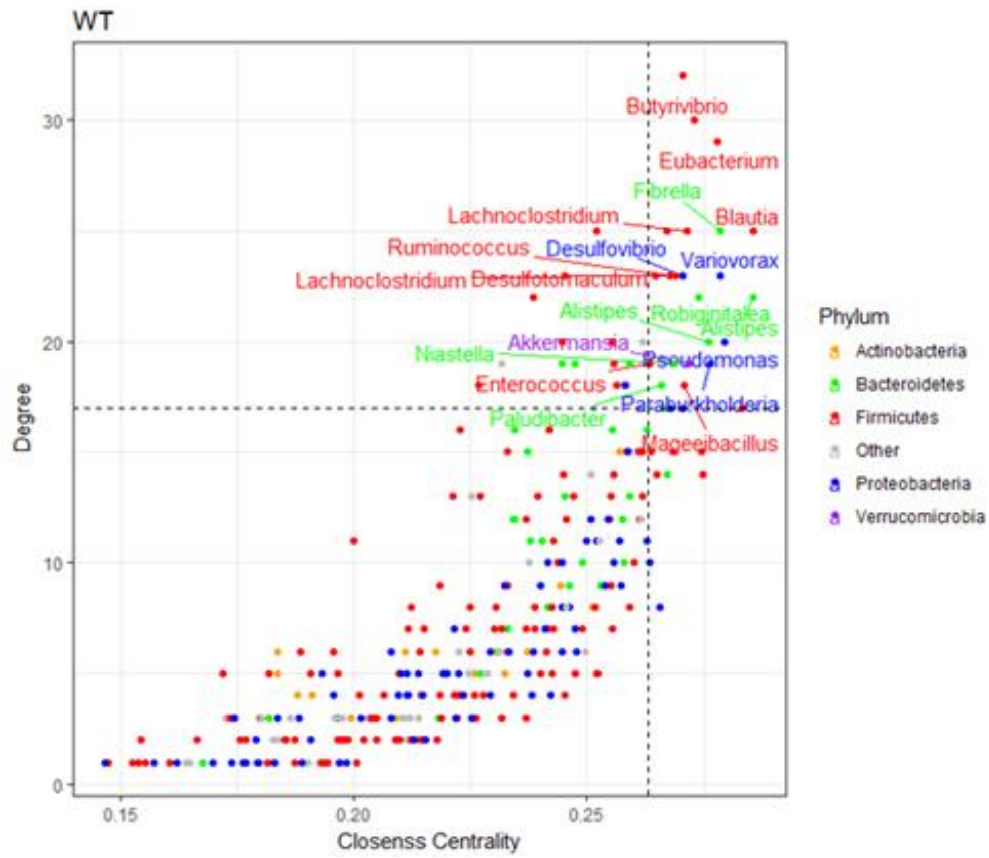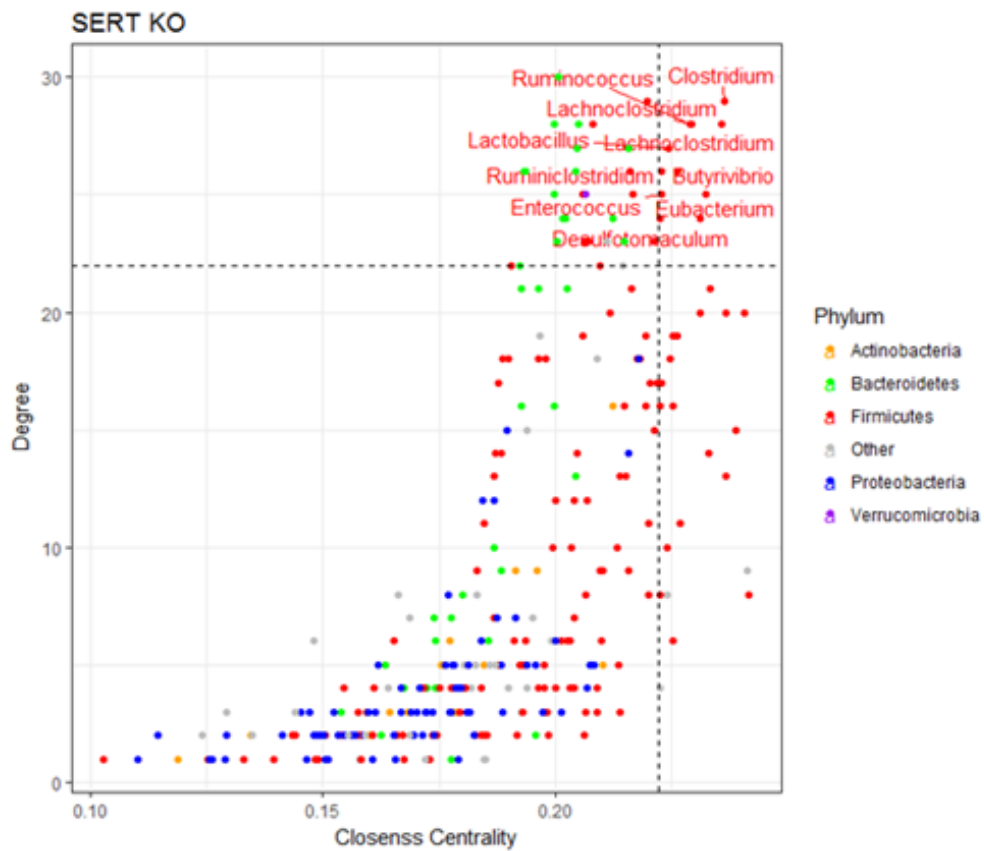

**Figure S2. Differences in hub species between SERT<sup>+/+</sup> and SERT<sup>-/-</sup> co-occurrence networks.**

Scatterplots of species degree and closeness centrality in SERT<sup>+/+</sup> and SERT<sup>-/-</sup> co-occurrence networks.

Species are colored by phylum. Dashed line represent 90<sup>th</sup> percentile of Degree and Closeness centrality in each network. Species in the 90<sup>th</sup> percentile for degree and closeness centrality are labeled by genus.

**Table E1: Primer sequences**

| Gene          | Accession No. | Primer sequence (5' → 3')                             |
|---------------|---------------|-------------------------------------------------------|
| <i>Acot1</i>  | NM_012006     | F: ATACCCCTGTGACTATCCTGA<br>R: CAAACACTCACTACCCAACTGT |
| <i>Hmgcs2</i> | NM_008256     | F: GAAGAGAGCGATGCAGGAAAC<br>R: GTCCACATATTGGGCTGGAAA  |
| <i>Hmgcr</i>  | NM_008255     | F: AGAGCGAGTGCATTAGCAAAG<br>R: GATTGCCATTCCACGAGCTAT  |
| <i>Cyp1a1</i> | NM_001136059  | F: GGGTTTGACACAGTCACAAC<br>R: GGGACGAAGGATGAATGCCG    |
| <i>Gapdh</i>  | NM_008084     | F: TGTGTCCGTCGTGGATCTGA<br>R: CCTGCTTCACCACCTTCTTGAT  |
| <i>Cldn8</i>  | NM_018778     | F: GCAACCTACGCTCTTCAAATGG<br>R: TTCCAGCGGTTCTCAAACAC  |

**Table E2. Bacterial Phyla Relative Abundances**

| Phyla                  | Cecal               |                     | Fecal               |                     |
|------------------------|---------------------|---------------------|---------------------|---------------------|
|                        | SERT <sup>+/+</sup> | SERT <sup>-/-</sup> | SERT <sup>+/+</sup> | SERT <sup>-/-</sup> |
| <b>Firmicutes</b>      | 42 (41-57)          | 56 (52-61)          | 30 (19-38)          | 46 (32-61)          |
| <b>Bacteroidetes</b>   | 18 (11-28)          | 19 (19-20)          | 46 (32-50)          | 31 (10-49)          |
| <b>Proteobacteria</b>  | 14 (10-15)          | 14 (10-16)          | 11 (8-12)           | 12 (10-13)          |
| <b>Actinobacteria</b>  | 6 (5-8)             | 4 (3-5)             | 8 (4-11)            | 6 (5-7)             |
| <b>Verrucomicrobia</b> | 0 (0-5)             | 0 (0-0)             | 0 (0-7)             | 0 (0-0)             |

Values are expressed as relative abundances in percentages of total reads. Values in parenthesis are interquartile range for the 25th and 75th percentiles. Top five phyla's values are shown.

Tables E3-E6 are provided as individual excel files.
